# Supplementary material for: The changes of morphological and physiological characteristics in hemiparasiticMonochasma savatieribefore and after attachment to the host plant
Source: PeerJ journal article supplement (doi:10.7717/peerj.9780), 2020-08-19
Supplement: Figure_S1.pdf [file Figure_S1.pdf]

PE-GJ

PE+GJ

AE-GJ

AE+GJ

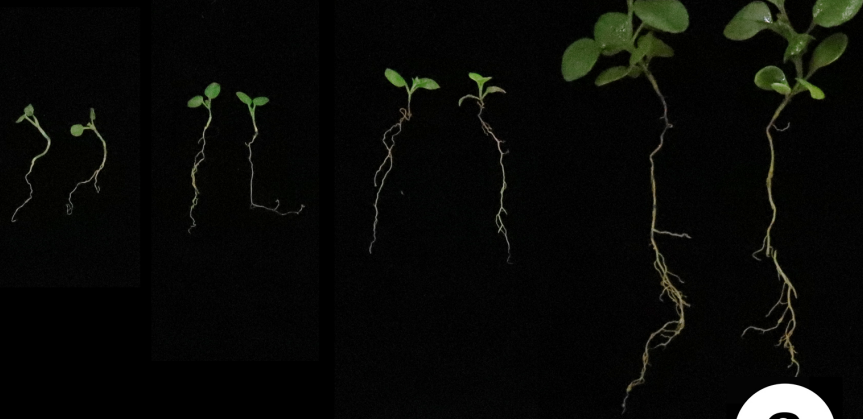

**a**

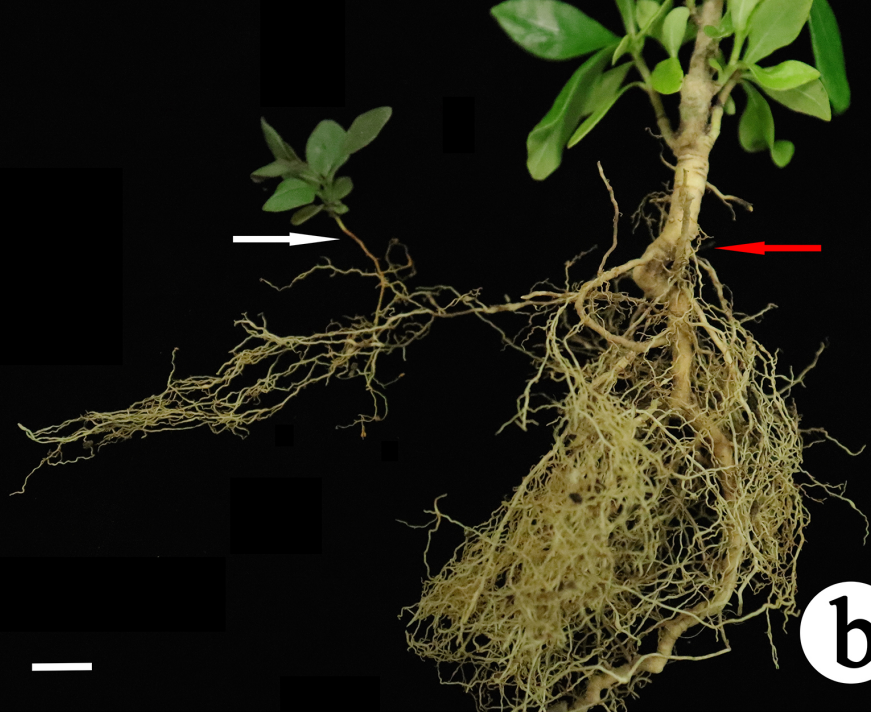

**b**

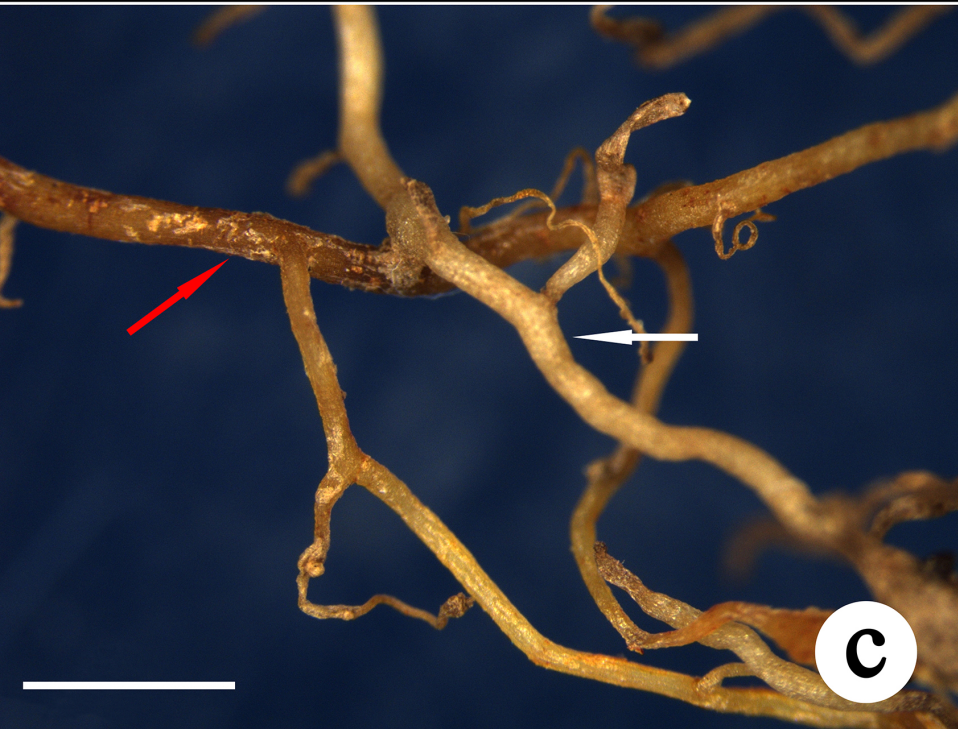

**c**

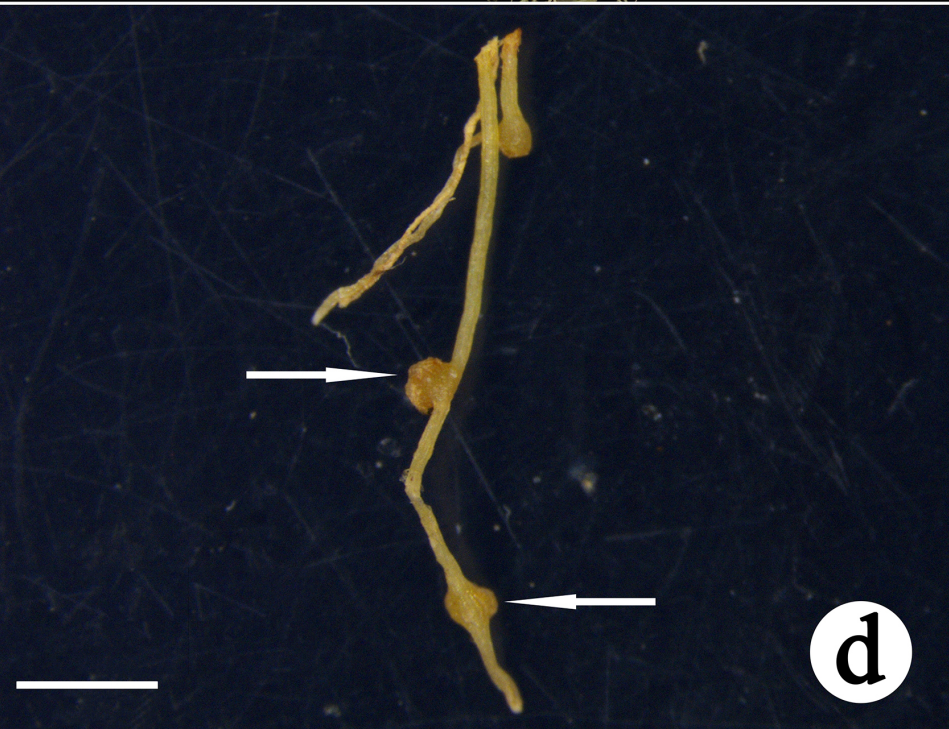

**d**
