# Supplementary material for: The changes of morphological and physiological characteristics in hemiparasiticMonochasma savatieribefore and after attachment to the host plant
Source: PeerJ journal article supplement (doi:10.7717/peerj.9780), 2020-08-19

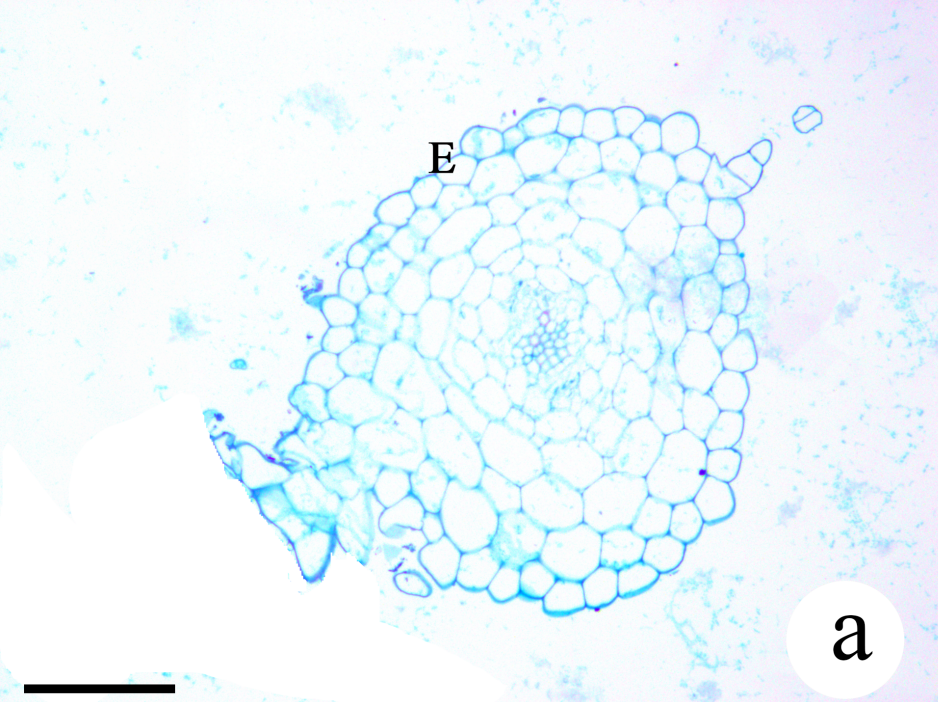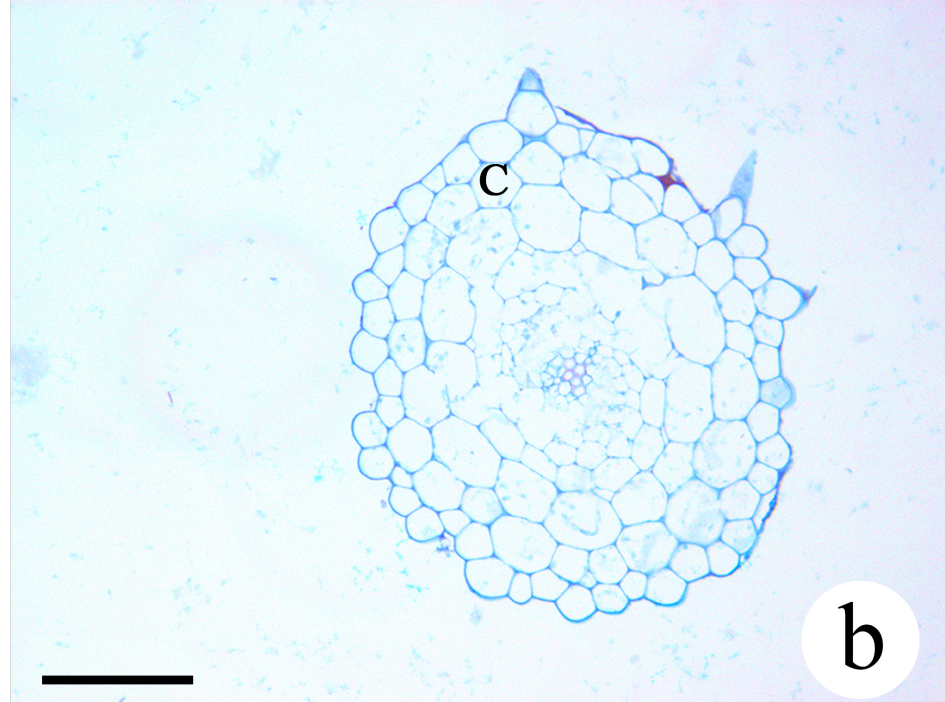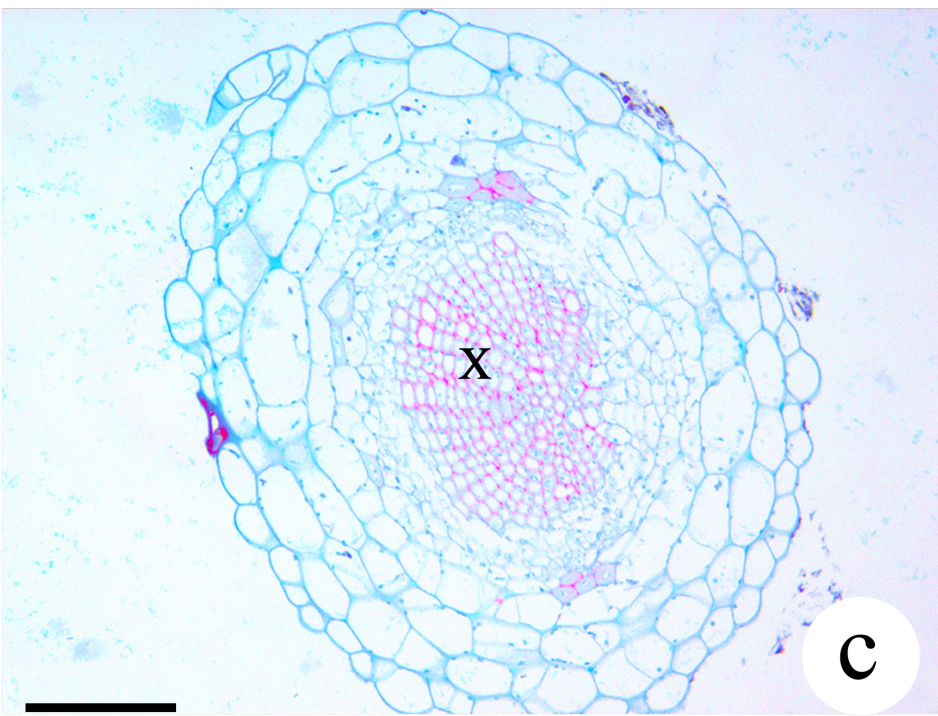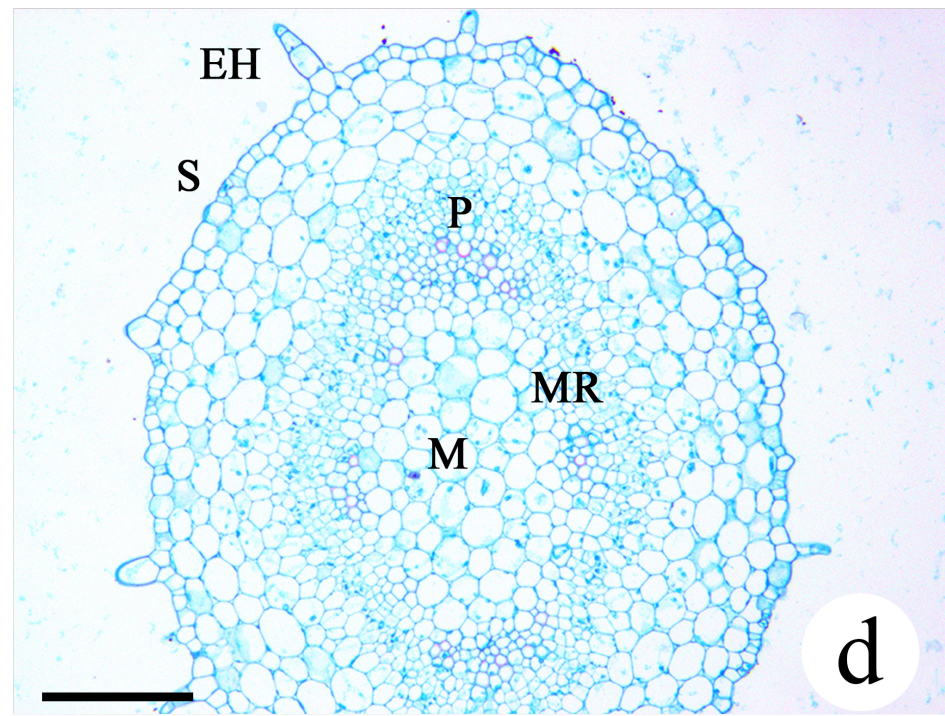

Supplement: Figure_S4.pdf [file Figure_S4.pdf]
