# Supplementary material for: The changes of morphological and physiological characteristics in hemiparasitic Monochasma savatieri before and after attachment to the host plant
Source: PeerJ. 2020 Aug 19;8:e9780. doi: 10.7717/peerj.9780 (PMC7443084; doi:10.7717/peerj.9780)
Supplement: Supplemental Information 9 — This was used to compare the growth indicators, physiological performance and structure-related characteristics of seedlings before and after establishment of parasite-host association. [file peerj-08-9780-s009.xlsx]

## Sheet: Growth indicators
	Means and standard deviations						biological repetition values
Seedling height (mm)				Treatment	Seedling height (mm)	Maximum root length (cm)	Number of roots	Number of leaves	Leaf length (cm)	Leaf width (cm)	Leaf area (cm2)
Treatment	Means	SD		PE-GJ	2.1	1.8	5	2	0.389	0.279	0.04
PE-GJ	2.41	0.36		PE-GJ	2.9	2.3	4	4	0.671	0.47	0.062
PE+GJ	3.4	0.4		PE-GJ	2.2	1.3	4	4	0.813	0.425	0.074
AE-GJ	7.93	0.53		PE-GJ	2	2.1	4	2	0.462	0.308	0.055
AE+GJ	15.82	0.6		PE-GJ	2.1	2	5	2	0.44	0.317	0.056
				PE-GJ	2.9	1.7	5	4	0.887	0.603	0.103
Maximum root length (cm)				PE-GJ	2.2	1.8	4	2	0.582	0.374	0.05
Treatment	Means	SD		PE-GJ	2.7	2.1	4	2	0.37	0.33	0.05
PE-GJ	1.84	0.32		PE-GJ	2.6	1.5	3	4	0.483	0.309	0.058
PE+GJ	2.26	0.32		PE+GJ	3.9	2	6	2	0.562	0.386	0.072
AE-GJ	2.95	0.51		PE+GJ	3.9	2.8	7	4	0.71	0.489	0.074
AE+GJ	4.44	0.64		PE+GJ	3.2	2	6	4	0.904	0.578	0.102
				PE+GJ	3.1	2.5	8	2	0.987	0.7	0.146
Number of roots				PE+GJ	4	2.6	6	4	0.973	0.667	0.128
Treatment	Means	SD		PE+GJ	3.2	2.3	9	4	0.522	0.432	0.088
PE-GJ	4.22	0.67		PE+GJ	3.1	2.2	6	4	1.105	0.664	0.122
PE+GJ	6.67	1.12		PE+GJ	3.1	2	6	2	0.374	0.331	0.051
AE-GJ	14.89	1.27		PE+GJ	3.1	1.9	6	4	0.999	0.552	0.103
AE+GJ	23.33	1.87		AE-GJ	7.8	2.7	14	4	2.903	2.468	0.557
				AE-GJ	7	2.7	15	6	1.345	1.349	0.472
Number of leaves				AE-GJ	7.9	2.4	17	6	1.415	1.222	0.483
Treatment	Means	SD		AE-GJ	8.8	2.9	14	4	2.299	1.74	0.664
PE-GJ	2.89	1.05		AE-GJ	7.8	3.5	13	6	2.039	1.729	0.472
PE+GJ	3.33	1		AE-GJ	7.6	3.3	15	4	1.323	1.207	0.439
AE-GJ	5.11	1.05		AE-GJ	8	3.9	16	4	1.729	1.485	0.456
AE+GJ	12	1.41		AE-GJ	7.9	2.55	16	6	1.432	1.38	0.433
				AE-GJ	8.6	2.6	14	6	1.807	1.535	0.321
Total leaf length (cm)				AE+GJ	16.2	4.29	23	14	6.544	3.443	1.637
Treatment	Means	SD		AE+GJ	15.1	4.25	20	12	6.438	3.498	1.584
PE-GJ	0.57	0.19		AE+GJ	16.9	4.36	26	12	5.978	3.454	1.592
PE+GJ	0.79	0.26		AE+GJ	15.9	4.51	25	12	5.964	3.587	1.545
AE-GJ	1.81	0.53		AE+GJ	15.2	3.52	22	14	6.581	3.504	1.611
AE+GJ	6.15	0.45		AE+GJ	16.1	4.02	24	10	5.866	3.026	1.465
				AE+GJ	15.8	5.89	23	12	6.077	3.642	1.922
Total leaf width (cm)				AE+GJ	16.1	4.49	22	12	6.66	3.697	1.629
Treatment	Means	SD		AE+GJ	15.1	4.61	25	10	5.276	2.411	1.419
PE-GJ	0.38	0.1
PE+GJ	0.53	0.13
AE-GJ	1.57	0.39
AE+GJ	3.36	0.41
Total leaf area (cm2)
Treatment	Means	SD
PE-GJ	0.06	0.02
PE+GJ	0.1	0.03
AE-GJ	0.48	0.09
AE+GJ	1.6	0.14

## Sheet: Haustoria and biomass
	Means and standard deviations					biological repetition values
Number of haustoria per plant				Treatment	Number of haustoria per plant	Number of presumably functional haustoria per plant	Total dry weight of 7 plants (mg)
Treatment	Means	SD		PE-GJ	0	0	1.1
PE-GJ	0.22	0.44		PE-GJ	0	0	2
PE+GJ	2.67	0.87		PE-GJ	0	0	0.8
AE-GJ	3	0.87		PE-GJ	0	0	1.2
AE+GJ	12.11	0.93		PE-GJ	0	0	1.5
				PE-GJ	1	0	1.3
Number of presumably functional haustoria per plant				PE-GJ	0	0
Treatment	Means	SD		PE-GJ	1	0
PE-GJ	0	0		PE-GJ	0	0
PE+GJ	0	0		PE+GJ	4	0	2
AE-GJ	0.78	0.44		PE+GJ	2	0	1.3
AE+GJ	5.11	1.05		PE+GJ	2	0	1.2
				PE+GJ	2	0	1.4
Total dry weight of 7 plants (mg)				PE+GJ	2	0	1.6
Treatment	Means	SD		PE+GJ	3	0	1.7
PE-GJ	1.32	0.41		PE+GJ	2	0
PE+GJ	1.53	0.29		PE+GJ	3	0
AE-GJ	10.22	1.29		PE+GJ	4	0
AE+GJ	51.33	1.71		AE-GJ	4	0	10.1
				AE-GJ	3	1	8.7
				AE-GJ	3	1	12.6
				AE-GJ	2	1	9.8
				AE-GJ	2	1	10.3
				AE-GJ	2	0	9.8
				AE-GJ	4	1
				AE-GJ	4	1
				AE-GJ	3	1
				AE+GJ	13	4	51.5
				AE+GJ	12	4	49
				AE+GJ	11	5	51.2
				AE+GJ	13	5	53.9
				AE+GJ	13	6	50.1
				AE+GJ	11	4	52.3
				AE+GJ	12	5
				AE+GJ	13	6
				AE+GJ	11	7

## Sheet: Photosynthetic pigment contents
	Means and standard deviations					biological repetition values
Chlorophyll a content (mg·g-1)				Treatment	Chlorophyll a content (mg·g-1)	Chlorophyll b content (mg·g-1)	Carotenoid content (mg·g-1)	Chlorophyll content (mg·g-1)
Treatment	Means	SD		PE-GJ	0.169574	0.086088	0.0553856	0.255662
PE-GJ	0.181	0.032		PE-GJ	0.217232	0.11232	0.0622871	0.329552
PE+GJ	0.219	0.037		PE-GJ	0.155586	0.084888	0.0454527	0.240474
AE-GJ	0.799	0.016		PE+GJ	0.242418	0.116184	0.0618984	0.358602
AE+GJ	0.995	0.029		PE+GJ	0.236838	0.119112	0.0605732	0.35595
				PE+GJ	0.176644	0.103728	0.0405302	0.280372
Chlorophyll b content (mg·g-1)				AE-GJ	0.784074	0.501724	0.0947364	1.2858
Treatment	Means	SD		AE-GJ	0.81492	0.512841	0.100869	1.32776
PE-GJ	0.094	0.016		AE-GJ	0.797026	0.510096	0.0959248	1.30712
PE+GJ	0.113	0.008		AE+GJ	0.96722	0.633339	0.113609	1.60056
AE-GJ	0.508	0.006		AE+GJ	0.993342	0.646164	0.11816	1.63951
AE+GJ	0.649	0.017		AE+GJ	1.02493	0.666072	0.121882	1.691
Carotenoid content (mg·g-1)
Treatment	Means	SD
PE-GJ	0.054	0.009
PE+GJ	0.054	0.012
AE-GJ	0.097	0.003
AE+GJ	0.118	0.004
Chlorophyll content (mg·g-1)
Treatment	Means	SD
PE-GJ	0.275	0.048
PE+GJ	0.332	0.044
AE-GJ	1.307	0.021
AE+GJ	1.644	0.045

## Sheet: TSS, SP, P and CMP
	Means and standard deviations					biological repetition values
Total soluble sugar content (mg·g-1)				Treatment	Total soluble sugar content (mg·g-1)	Soluble protein content (mg·g-1)	Proline content (μg·g-1)	Cell membrane permeability (%)
Treatment	Means	SD		PE-GJ	23.3476	2.11106	28.9222	31.0038
PE-GJ	23.62	0.24		PE-GJ	23.7585	2.91723	16.469	32
PE+GJ	26.7	0.43		PE-GJ	23.7585	2.52618	22.242	31.8
AE-GJ	26.43	0.54		PE+GJ	26.2238	2.89753	28.9846	30.9436
AE+GJ	30.33	0.21		PE+GJ	27.0456	2.59343	23.9534	30.6
				PE+GJ	26.8401	2.45774	35.18	30.1
Soluble protein content (mg·g-1)				AE-GJ	25.8129	5.58327	72.602	37.8579
Treatment	Means	SD		AE-GJ	26.8401	5.7234	76.3442	37.9
PE-GJ	2.52	0.4		AE-GJ	26.6347	5.18638	65.1176	39
PE+GJ	2.65	0.23		AE+GJ	30.1272	7.05544	83.8286	11.708
AE-GJ	5.5	0.28		AE+GJ	30.538	7.83167	68.8598	11.9
AE+GJ	7.56	0.44		AE+GJ	30.3326	7.78597	80.0864	11.6
Proline content (μg·g-1)
Treatment	Means	SD
PE-GJ	22.54	6.23
PE+GJ	29.37	5.62
AE-GJ	71.36	5.72
AE+GJ	77.59	7.79
Cell membrane permeability (%)
Treatment	Means	SD
PE-GJ	31.6	0.53
PE+GJ	30.55	0.42
AE-GJ	38.25	0.65
AE+GJ	11.74	0.15

## Sheet: MDA and antioxidant enzymes
	Means and standard deviations					biological repetition values
Malondialdehyde content (μmol·g-1)				Treatment	Malondialdehyde content (μmol·g-1)	SOD activity (U·g-1·min-1)	POD activity (U·g-1·min-1)	CAT activity (U·g-1·min-1)	APX activity (U·g-1·min-1)
Treatment	Means	SD		PE-GJ	0.364903	169.639	71.0526	92.1053	22.3684
PE-GJ	0.37	0.01		PE-GJ	0.38228	170.735	51.7007	54.4218	17.6871
PE+GJ	0.35	0		PE-GJ	0.373591	169.581	97.027	72.7027	22.973
AE-GJ	0.44	0.02		PE+GJ	0.345225	170.63	64	173.333	29.3333
AE+GJ	0.24	0.04		PE+GJ	0.348659	172.549	72	146.667	41
				PE+GJ	0.348642	165.119	77.3333	146.667	29.3333
SOD activity (U·g-1·min-1)				AE-GJ	0.460102	156.212	74.1722	92.7152	25.1656
Treatment	Means	SD		AE-GJ	0.434409	159.959	50	52.6316	26.3158
PE-GJ	169.99	0.65		AE-GJ	0.422668	159.959	65.7895	92.1053	22.3684
PE+GJ	169.43	3.86		AE+GJ	0.284811	177.32	110.066	279.47	52.9801
AE-GJ	158.71	2.16		AE+GJ	0.247527	183.007	152	373.333	40.6667
AE+GJ	179.37	3.16		AE+GJ	0.200085	177.778	131.579	318.421	56.5789
POD activity (U·g-1·min-1)
Treatment	Means	SD
PE-GJ	73.26	22.74
PE+GJ	71.11	6.71
AE-GJ	63.32	12.27
AE+GJ	131.22	20.97
CAT activity (U·g-1·min-1)
Treatment	Means	SD
PE-GJ	73.08	18.85
PE+GJ	155.56	15.4
AE-GJ	79.15	22.97
AE+GJ	323.74	47.16
APX activity (U·g-1·min-1)
Treatment	Means	SD
PE-GJ	21.01	2.89
PE+GJ	33.22	6.74
AE-GJ	24.62	2.03
AE+GJ	50.08	8.34

## Sheet: Stele diameter,stomatal density
	Means and standard deviations				biological repetition values
Stele diameter				Treatment	Stele diameter (µm)	Stomatal density (mm-2)
Treatment	Means	SD		PE-GJ	45.23	408.809
PE-GJ	49.84	8.67		PE-GJ	39.755	393.748
PE+GJ	51.95	5.55		PE-GJ	53.275	372.117
AE-GJ	159.71	15.2		PE-GJ	42.11	373.141
AE+GJ	331.91	14.02		PE-GJ	59.002	326.747
				PE-GJ	59.69	388.622
Stomatal density				PE+GJ	61.545	343.557
Treatment	Means	SD		PE+GJ	50.181	384.573
PE-GJ	377.2	28.25		PE+GJ	44.713	365.378
PE+GJ	365.39	43.46		PE+GJ	50.038	344.705
AE-GJ	234.42	67.9		PE+GJ	53.64	314.232
AE+GJ	199.49	69.33		PE+GJ	51.587	439.912
				AE-GJ	173.137	288.358
				AE-GJ	160.819	269.312
				AE-GJ	159.905	248.066
				AE-GJ	177.53	124.039
				AE-GJ	135.478	181.257
				AE-GJ	151.386	295.489
				AE+GJ	339.268	164.065
				AE+GJ	320.34	165.378
				AE+GJ	322.158	248.066
				AE+GJ	316.237	103.366
				AE+GJ	349.436	218.292
				AE+GJ	344.013	297.771
